# Supplementary material for: Molecular weight-modulated electrospun poly(ε-caprolactone) membranes for postoperative adhesion prevention
Source: Royal Society of Chemistry journal article supplement (doi:10.1039/c4ra07216b), 2014-01-01
Supplement: c4ra07216b1.pdf [file c4ra07216b1.pdf]

## Electronic Supplementary Information

### Molecular weight-modulated electrospun poly( $\epsilon$ -caprolactone) membranes for postoperative adhesion prevention

Jin Zhang,<sup>†a</sup> He Liu,<sup>†c</sup> Huan Xu,<sup>a</sup> Jian-Xun Ding,<sup>\*b</sup> Xiu-Li Zhuang,<sup>b</sup> Xue-Si Chen,<sup>b</sup> Fei Chang,<sup>\*c</sup> Jia-Zhuang Xu,<sup>a</sup> Zhong-Ming Li<sup>\*a</sup>

<sup>a</sup> College of Polymer Science and Engineering, State Key Laboratory of Polymer Materials Engineering, Sichuan University, Chengdu 610065, Sichuan, P. R. China; E-mail: zml@scu.edu.cn (Z.-M.L.)

<sup>b</sup> Key Laboratory of Polymer Ecomaterials, Changchun Institute of Applied Chemistry, Chinese Academy of Sciences, Changchun 130022, P. R. China; E-mail: jxding@ciac.ac.cn (J.-X.D.)

<sup>c</sup> Department of Orthopedics, Second Hospital of Jilin University, Changchun 130041, P. R. China; E-mail: ccfei\_cn@hotmail.com (F.C.)

<sup>†</sup> These authors contributed equally to this work.

## Rheological Properties of PCL Solutions with Different Molecular Weights

The viscosities of PCL solutions with different molecular weights were measured using MCR 301 Rheometer (Anton Paar, Austria) at 25 °C with a SH47 spindle at 80 rpm. A cone and plate measurement system was employed with a diameter of 25 mm and a cone angle of 1°. A solvent trap was used to minimize sample evaporation.

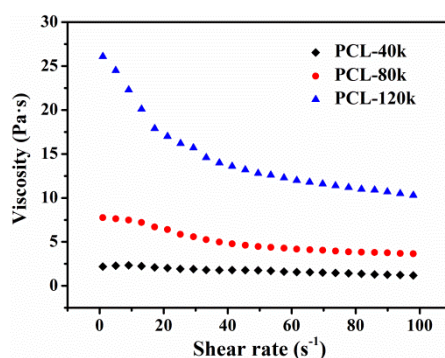

**Fig. S1** Changes of steady shear viscosity as a function of shear rate for the electrospun PCL membranes with different molecular weights.

## Effect of PCL Molecular Weight on Fiber Hydrophilicity

The hydrophilicity of the electrospun PCL membranes was qualitatively determined by measuring the contact angle of material with distilled water using KRUSS drop shape analyzer (DSA 100). The films were fixed into the custom made sample holder of the drop shape analyzer. The distilled water was taken in a 2.0 mL leuc lock syringe fitted with blunt edge needle. A single drop of volume  $\sim 2.0 \mu\text{L}$  was poured on the membranes. Drop shape on the surface was recorded using the camera attached with system. The contact angle was measured by sessile drop approximation with the inbuilt software of the instrument.

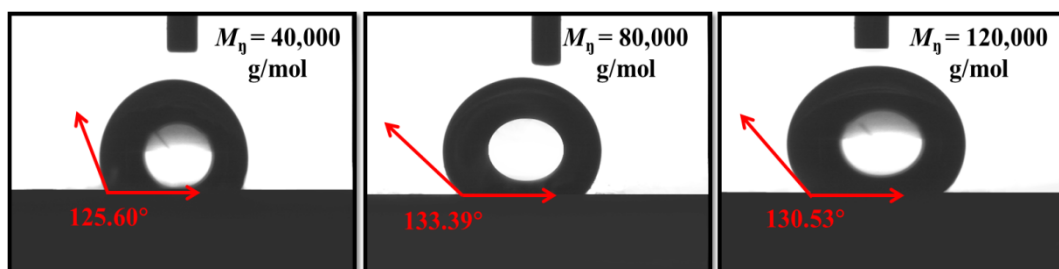

**Fig. S2** The contact angle images of electrospun PCL membranes with different molecular weights.
